# Supplementary material
Source: PubMed Central journal article supplement (PMC4286702)
Supplement: NIHMS650422-supplement-Supplemental_data.pdf [file NIHMS650422-supplement-Supplemental_data.pdf]

**Supplementary Table 1.** Antibodies used for RPPA staining. The company name and catalog number for all antibodies are listed.

| <b>Protein</b> | <b>Company</b> | <b>Catalog #</b> |
|----------------|----------------|------------------|
| 14_3_3_beta    | Santa Cruz     | 628              |
| 14_3_3_zeta    | Santa Cruz     | 1019             |
| 4EBP1          | Cell Signaling | 9452             |
| P-4EBP1_T37.46 | Cell Signaling | 9459             |
| P-4EBP1_S65    | Cell Signaling | 9456             |
| P-ACC_S79      | Cell Signaling | 3661             |
| AIB1           | BD Pharmingen  | 611105           |
| AKT            | Cell Signaling | 9272             |
| P-AKT_S473     | Cell Signaling | 9271             |
| P-AKT_T308     | Cell Signaling | 9275             |
| AMPK           | Cell Signaling | 2532             |
| P-AMPK_T172    | Cell Signaling | 2535             |
| Annexin1       | Zymed          | 71-3400          |
| AR             | Epitomics      | 1852             |
| b.catenin      | Cell Signaling | 9562             |
| P-BRAF_S445    | Cell Signaling | 2696             |
| BAD            | Epitomics      | 1541-1           |
| P-BAD_S112     | Cell Signaling | 9296             |
| P-BAD_S136     | Cell Signaling | 9295             |
| BCI.XL         | Cell Signaling | 2762             |
| Bcl2           | Dako           | M0887            |
| Beclin         | Cell Signaling | 3738             |
| Bim            | Epitomics      | 1036-1           |
| BRAF           | Santa Cruz     | 5284             |
| c.KIT          | Epitomics      | 1552             |
| CRAF           | Upstate        | 5-739            |
| Caviolin       | Cell Signaling | 3238             |
| CD31           | Dako           | M0823            |
| IGF1R BETA     | Cell Signaling | 3027             |

**Supplementary Table 1.**

...Continued

| <b>Protein</b>     | <b>Company</b> | <b>Catalog #</b> |
|--------------------|----------------|------------------|
| CDK4               | Upstate        | 7659             |
| Cl.Caspase7        | Cell Signaling | 9491             |
| CollagenVI         | Santa Cruz     | 20649            |
| CyclinB1           | Epitomics      | 1495             |
| CyclinD1           | Santa Cruz     | 718              |
| CyclinE1           | Santa Cruz     | 247              |
| E-Cadherin         | Cell Signaling | 4065             |
| EGFR               | Santa Cruz     | 3                |
| eIE4E              | Cell Signaling | 9741             |
| ERK2               | Santa Cruz     | 154              |
| ETV                | SDI            | 2626             |
| FKHRL1             | Cell Signaling | 9467             |
| P-FOXO3a_S318      | Cell Signaling | 9465             |
| GSK                | Santa Cruz     | 7291             |
| P-GSK_S21.9        | Cell Signaling | 9331             |
| IGFBP2             | Cell Signaling | 3922             |
| IKKa               | Epitomics      | 1615             |
| P-IKKa_S176.S177   | Cell Signaling | 2078             |
| IRS1               | Upstate        | 6-248            |
| P-JNK_T183.Y185    | Cell Signaling | 4671             |
| LKB1               | Abcam          | 15095            |
| P-MAPK_T202.Y204   | Cell Signaling | 4377             |
| MEK1               | Epitomics      | 1235-1           |
| P-MEK1,2_pS217.221 | Cell Signaling | 9121             |
| MGMT               | Chemicon       | 16200            |
| MTOR               | Cell Signaling | 2983             |
| N-Cadherin         | Cell Signaling | 4061             |
| NOS2               | Santa Cruz     | 651              |
| OPN                | Abcam          | 33046            |
| P21                | Santa Cruz     | 397              |
| p27                | Santa Cruz     | 528              |
| p38                | Cell Signaling | 9212             |
| P-P38_T180_Y182    | Cell Signaling | 9211             |
| p53                | Cell Signaling | 9282             |

**Supplementary Table 1.**

...Continued

| <b>Protein</b>  | <b>Company</b> | <b>Catalog #</b> |
|-----------------|----------------|------------------|
| P-p65.NFkB_S536 | Cell Signaling | 3033             |
| p70s6k          | Cell Signaling | 9205             |
| P-p70S6K_T389   | Epitomics      | 1494             |
| PKD1            | Cell Signaling | 3062             |
| PKD1_pS241      | Cell Signaling | 3061             |
| PKC             | Upstate        | 5-154            |
| P-PKC_S657      | Upstate        | 6-822            |
| PTEN            | Cell Signaling | 9552             |
| Rb              | Cell Signaling | 9309             |
| P-Rb_S807_811   | Cell Signaling | 9308             |
| S6              | Cell Signaling | 2217             |
| P-S6_S235_236   | Cell Signaling | 2211             |
| P-S6_S240_244   | Cell Signaling | 2215             |
| Smad3           | Cell Signaling | 9523             |
| Smad5           | Epitomics      | 1682             |
| PSmad5_S463     | Epitomics      | 2224             |
| SOCS1           | Zymed          | 38-5200          |
| Src             | Upstate        | 5-184            |
| P-Src_Y527      | Cell Signaling | 2105             |
| STAT1           | Cell Signaling | 9172             |
| P-STAT3_Y705    | Cell Signaling | 9131             |
| P-STAT5_Y694    | Epitomics      | 1208             |
| Stathmin        | Epitomics      | 1972             |
| TAZ             | Abcam          | 3961             |
| TGASE           | Neomarkers     | MS300P           |
| TRAF3           | Cell Signaling | 4729B            |
| TRAF6           | Epitomics      | 1660-5           |
| TSC2            | Epitomics      | 1613-1           |
| P-TSC2_S1462    | Cell Signaling | 3617             |
| VEGFR2          | Cell Signaling | 2479             |
| YAP             | Santa Cruz     | 15407            |
| P-YB1_S102      | Cell Signaling | 2900             |

**Supplementary Table 2.** Specific mutations in the cell lines were detected by mass spectroscopy genotyping. Relative IC50 values were determined from the dose response curves in Figure 1A using the 4PL and 3PLFT curve fit models as described in the NIH Chemical Genomics Center. ([www.nih.ncgc.gov](http://www.nih.ncgc.gov)).

| <b>Cell Line</b> | <b>Mutation Status</b> | <b>AZD6244 IC50 (nM)</b> |
|------------------|------------------------|--------------------------|
| WM2664           | BRAF, PTEN null        | 77                       |
| WM1799           | BRAF, PTEN-null        | 1417                     |
| UCSD354L         | BRAF, PTEN-null        | 524                      |
| WM1552           | BRAF, PTEN null        | 10                       |
| WM46             | BRAF, AKT3 E17K        | 9                        |
| MEL526           | BRAF                   | 3                        |
| A375             | BRAF                   | 3                        |
| SKMEL5           | BRAF                   | 1325                     |
| UACC257          | BRAF                   | 12                       |
| MEL624           | BRAF                   | 660                      |
| WM35             | BRAF                   | 0.1                      |
| Hs294T           | WT                     | >10000                   |
| MEWO             | WT                     | 26                       |

**Figure S1**

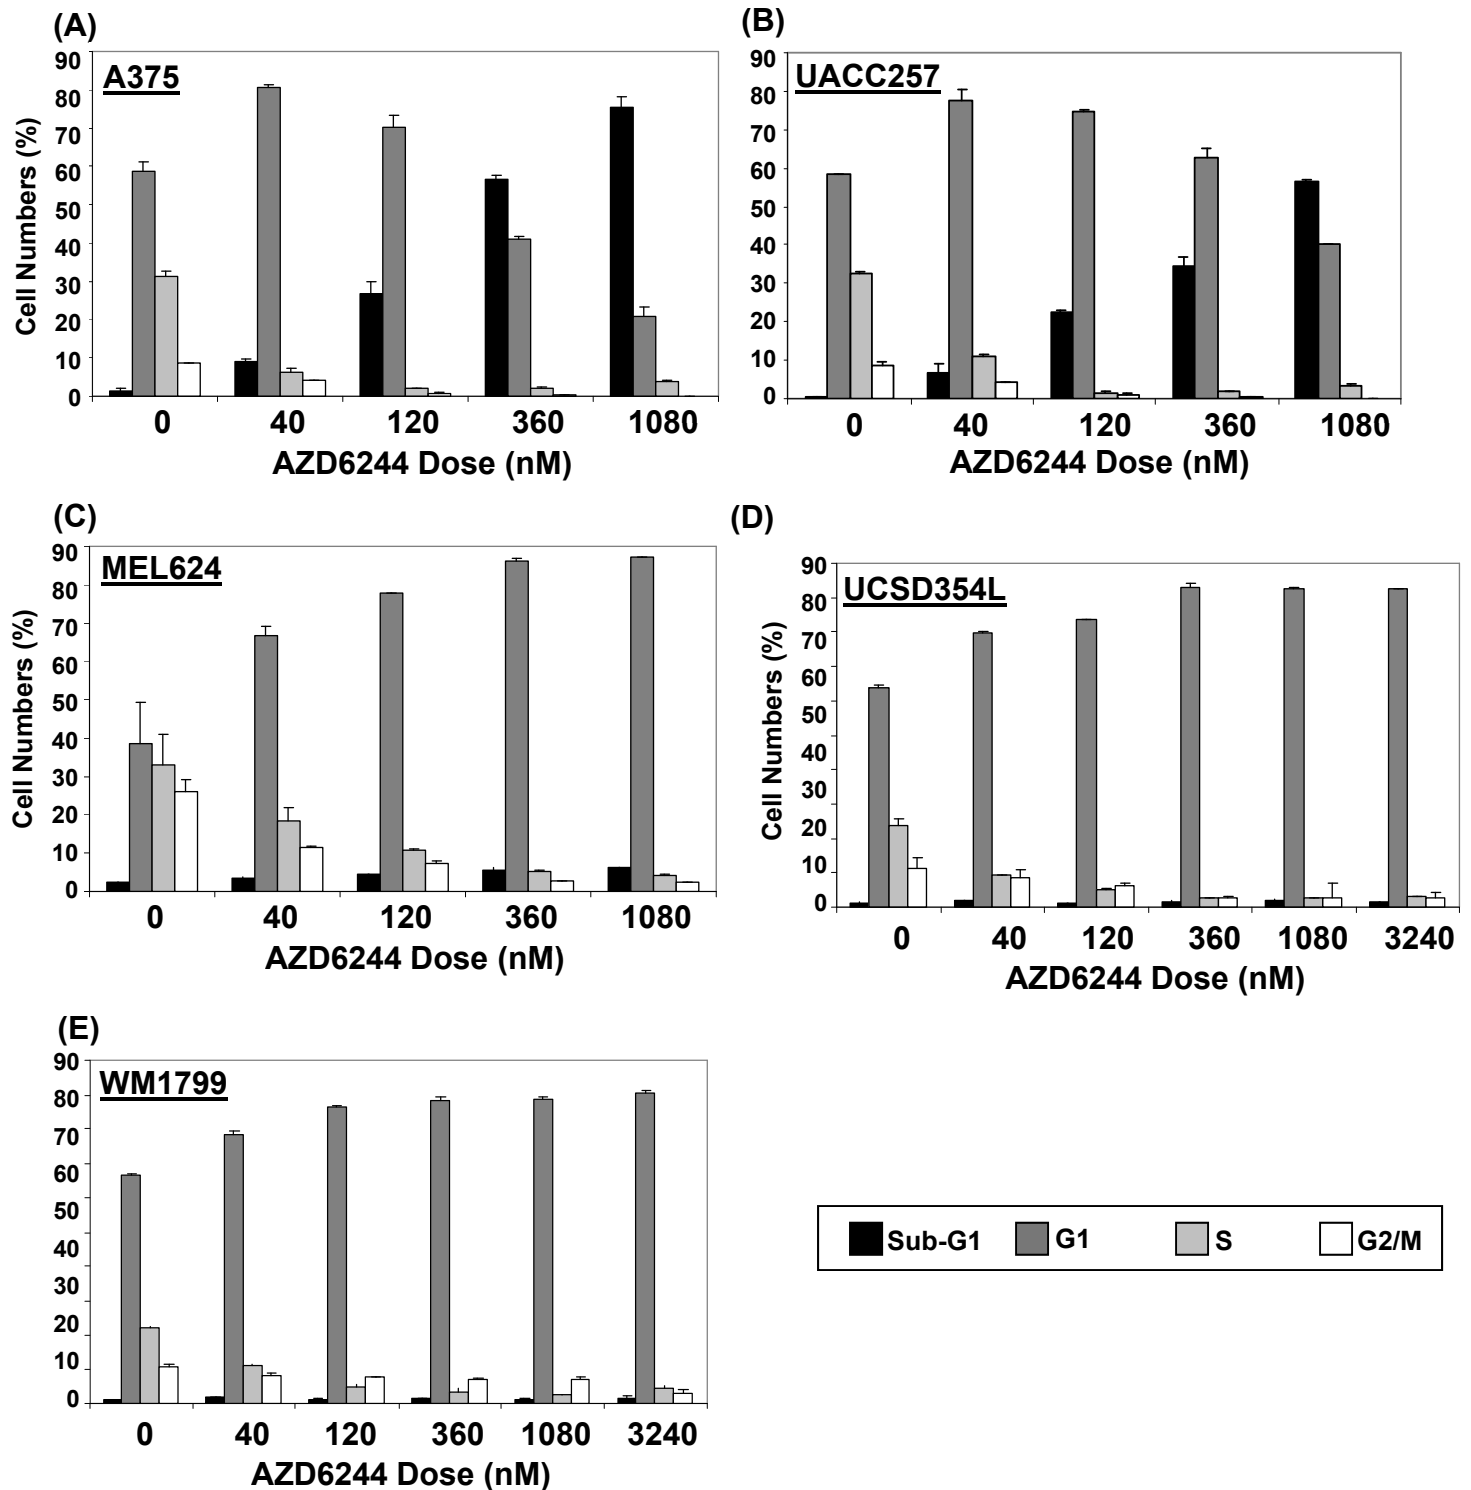

Cell cycle analysis of Group 1 (A & B), Group 2 (C, D, E) cells after 72h treatment with AZD6244. X-axis, concentration of AZD6244 (nM); Y-axis, % of cell population in different phases of the cell cycle. The phases of the cell cycle- Sub-G1 (dead cells), G1, S, and G2/M are indicated by black, dark grey, light grey and white bars respectively. Each bar is the average of two or three replicates and error bars indicate standard deviation. Names of cell lines are in the upper left corner of each graph.

**Figure S2**  
**Cell Cycle Profiles of AZD6244 Treatments**

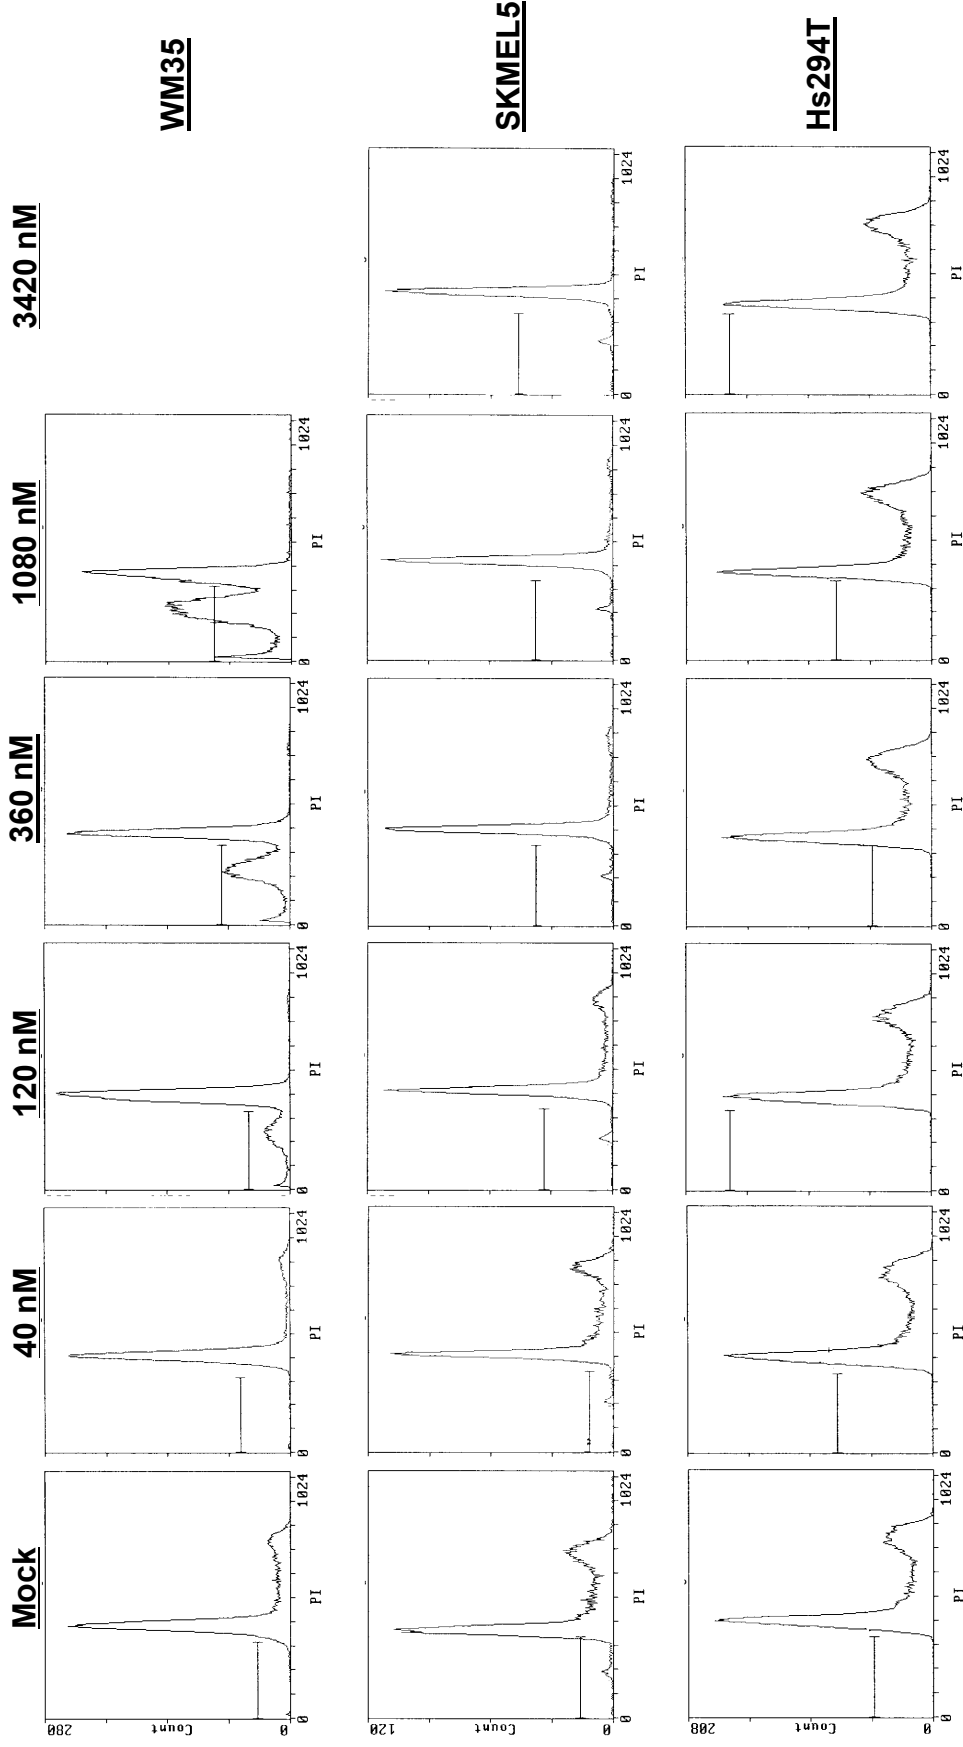

Cell cycle analysis histograms of WM35 (row 1), SKMEL5 (row 2) and Hs294T (row 3) cells after 72h treatment with AZD6244. X-axis, DNA content as stained by propidium iodide (PI); Y-axis, Cell numbers. The peaks represent sub-G1, G1, S and G2/M phases of the cell cycle. Horizontal lines inside the graphs represent the area of dead (sub-G1) cells. AZD6244 concentrations are indicated on the top of the histograms.

**Figure S3**

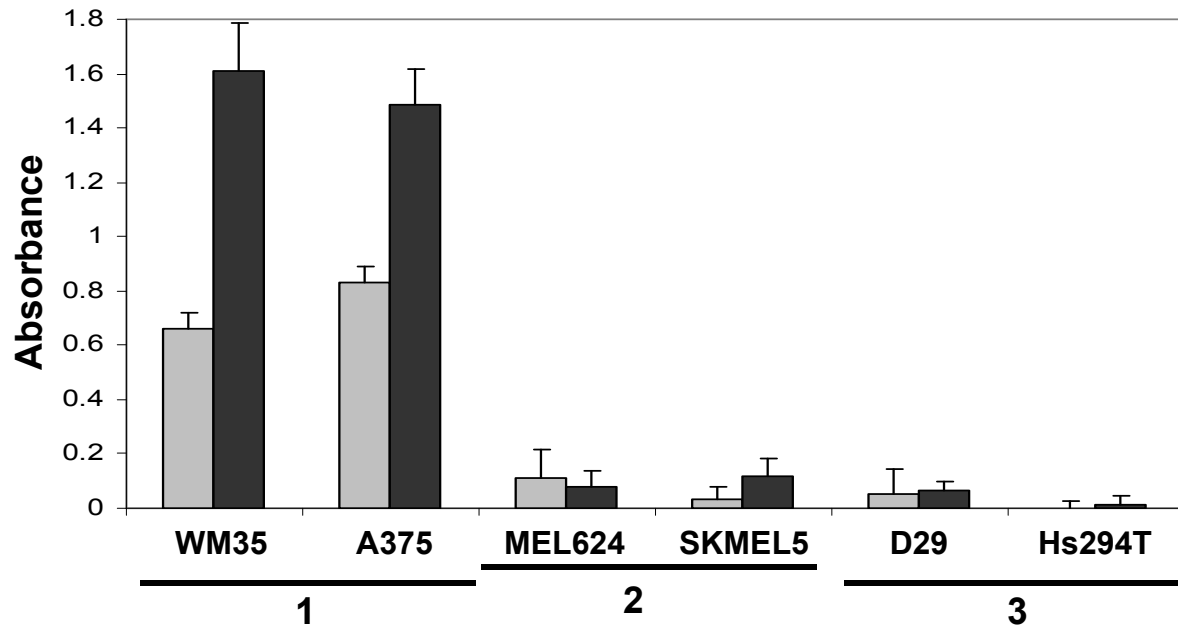

Two cell lines, each belonging to sensitivity groups 1, 2 and 3 were treated with vehicle or 360 nM AZD6244 for 24 h and 48 h. After incubation, cellular apoptosis was determined through cytoplasmic histone-DNA-fragment analysis. Increased absorbance at 405 nm in the treated samples relative to the untreated samples corresponded to increased apoptosis. The absorbance values of the AZD6244-treated samples were normalized against those of the vehicle-treated controls and plotted as bar graphs. Bars are average of triplicates and error bars represent standard deviation. 24h treatments are indicated by grey bars and 48 h treatments are indicated by black bars.

**Figure S4**

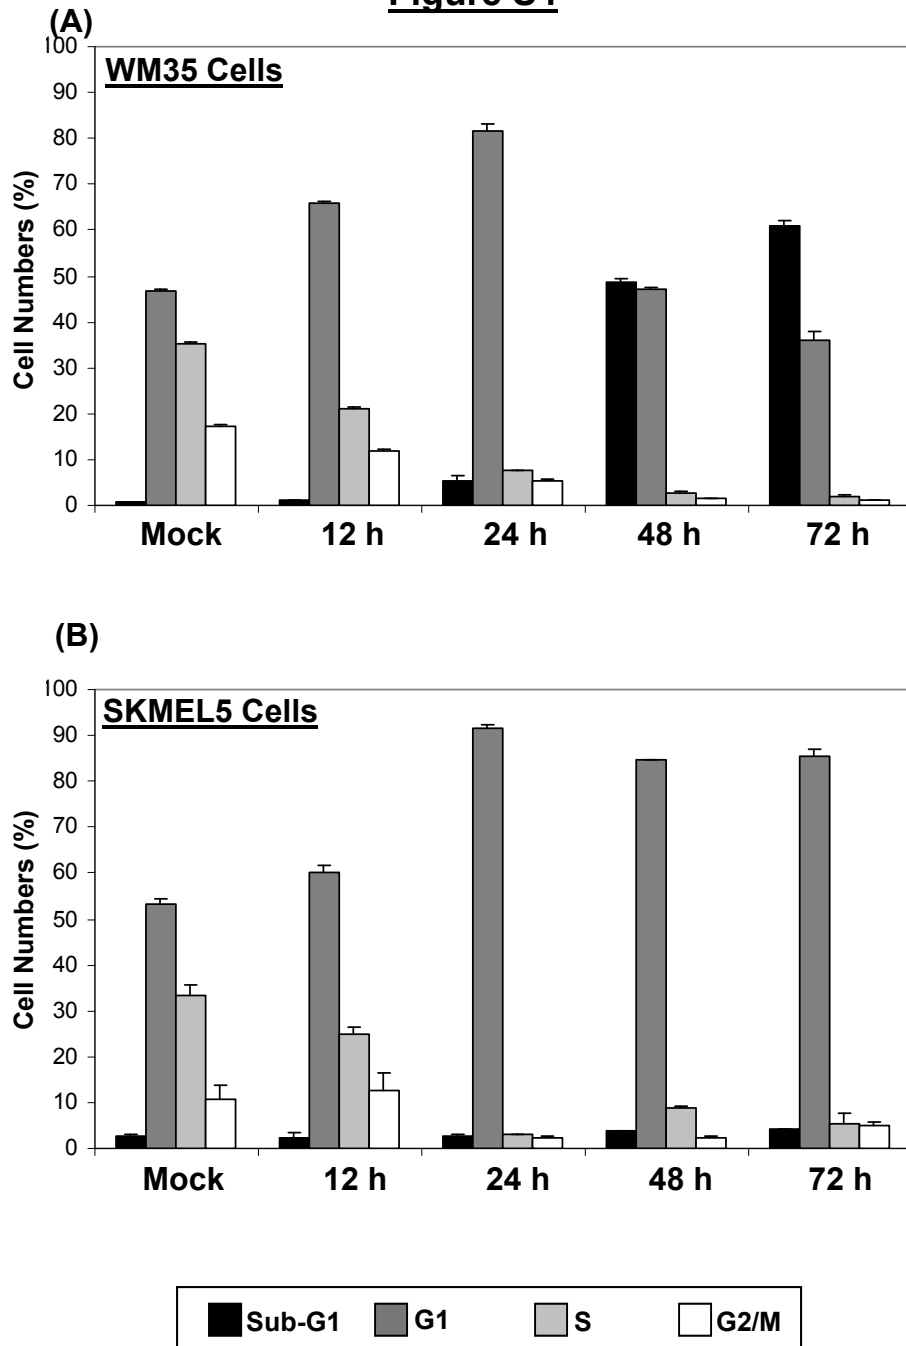

**Time-course Cell cycle analysis of WM35 and SKMEL5 cells.** X-axis, time of AZD6244 treatment; Y-axis, % of cell population. The cells were treated for the indicated periods of time, fixed and subjected to PI-cell cycle analysis. The phases of the cell cycle- Sub-G1 (dead cells), G1, S, and G2/M are indicated by black, dark grey, light grey and white bars respectively.



**Figure S5**

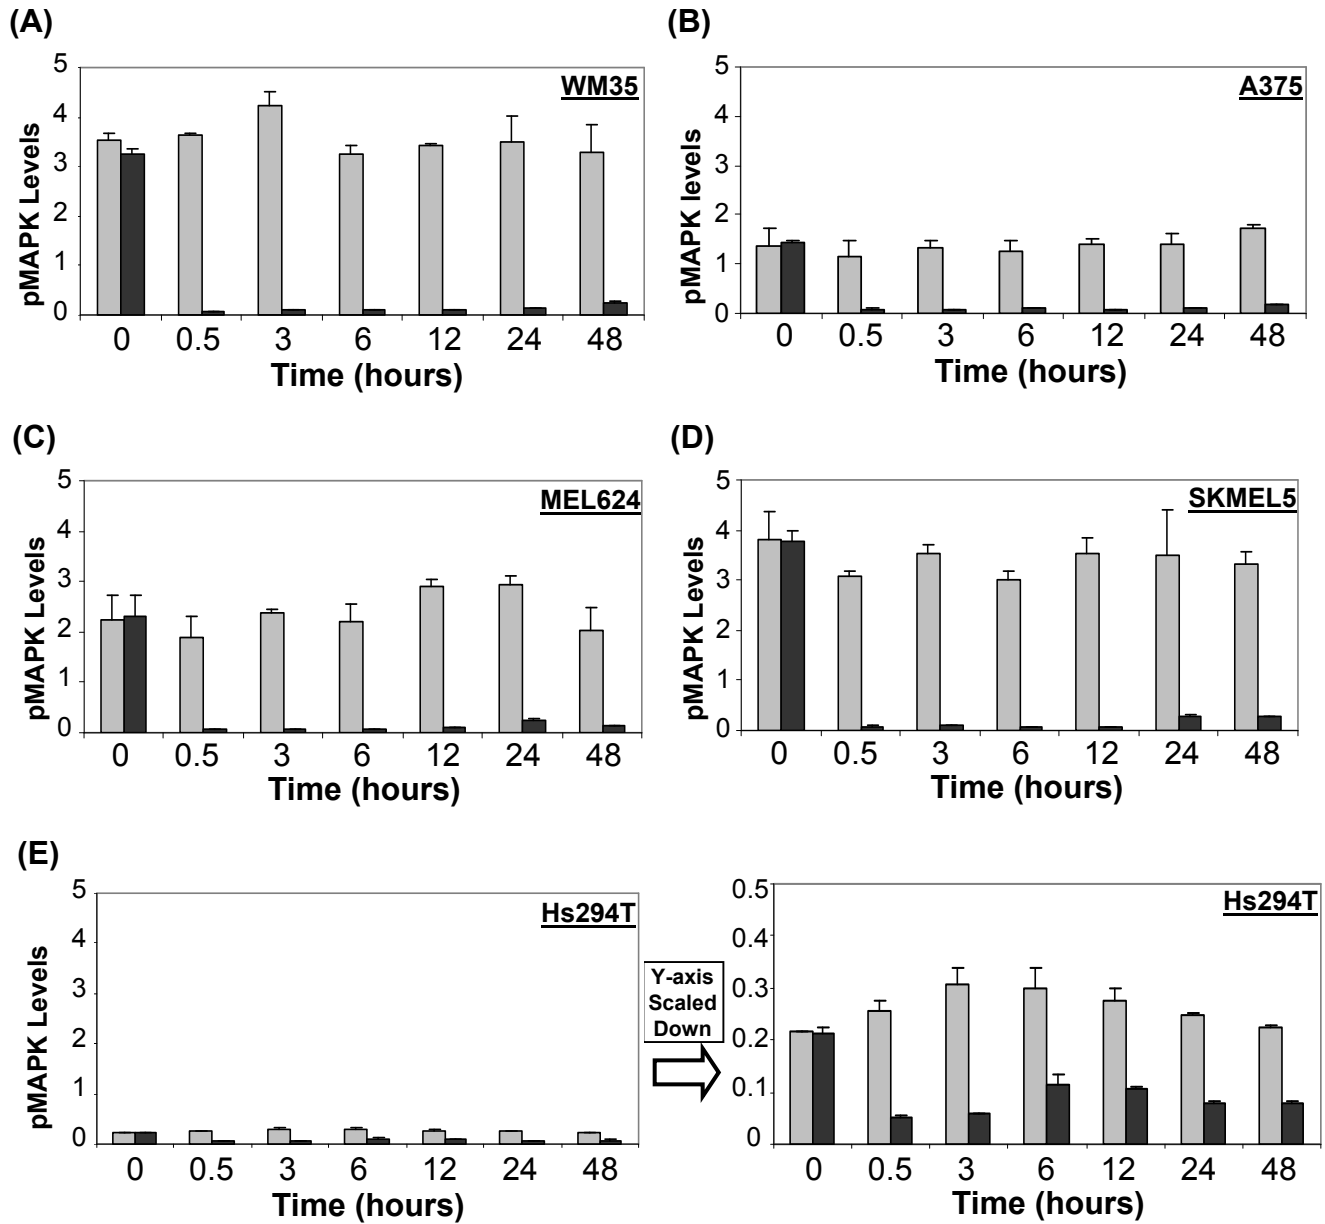

**AZD6244 durably and potently inhibits P-MAPK in sensitive and resistant human melanoma cell lines.** The load controlled linear intensity data of P-MAPK levels (Y-axis) were plotted against time of AZD6244 treatments (X-axis) for WM35 (A), A375 (B), MEL624(C), SKMEL5 (D) and Hs294T (E) cells respectively. Gray bar, DMSO treatment; Black bars, AZD6244 360 nM treatment. P-MAPK levels were equally inhibited in all cell lines, irrespective of the sensitivity to the growth and survival inhibitory effects of AZD6244. Note that Hs294T had extremely low levels of pMAPK levels, which were also inhibited (please see scaled Y-axis in the right panel of E).

**Figure S6**

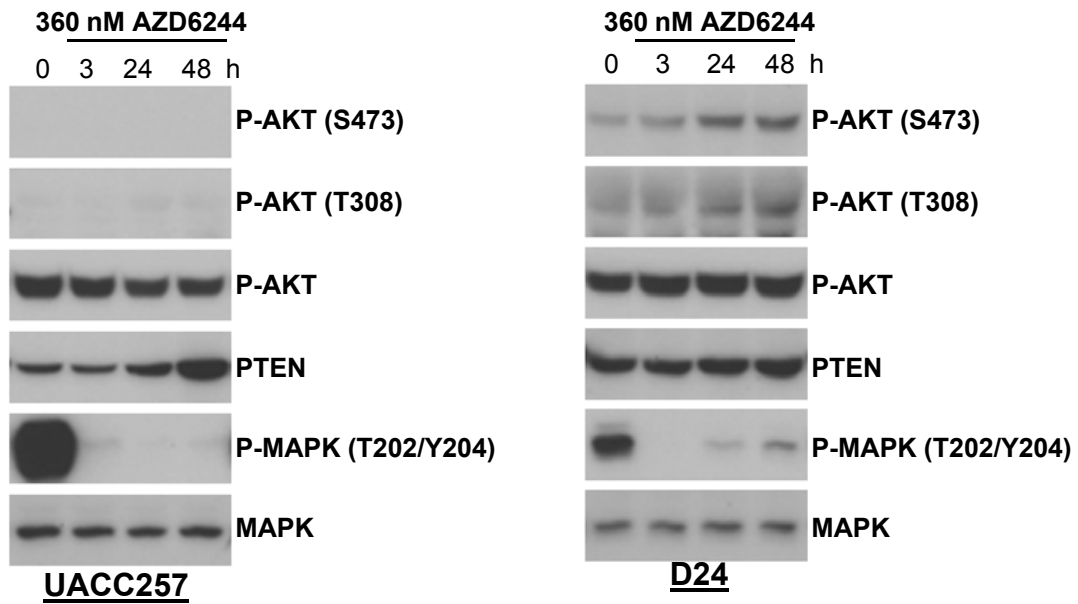

**Effect of AZD6244 treatments on PTEN and P-AKT levels in sensitive UACC257 and the resistant D24 cells.** The cells were treated with 360 nM AZD6244 for the indicated time points. Protein lysates were generated and western blotting with the indicated antibodies was performed.

**Figure S7**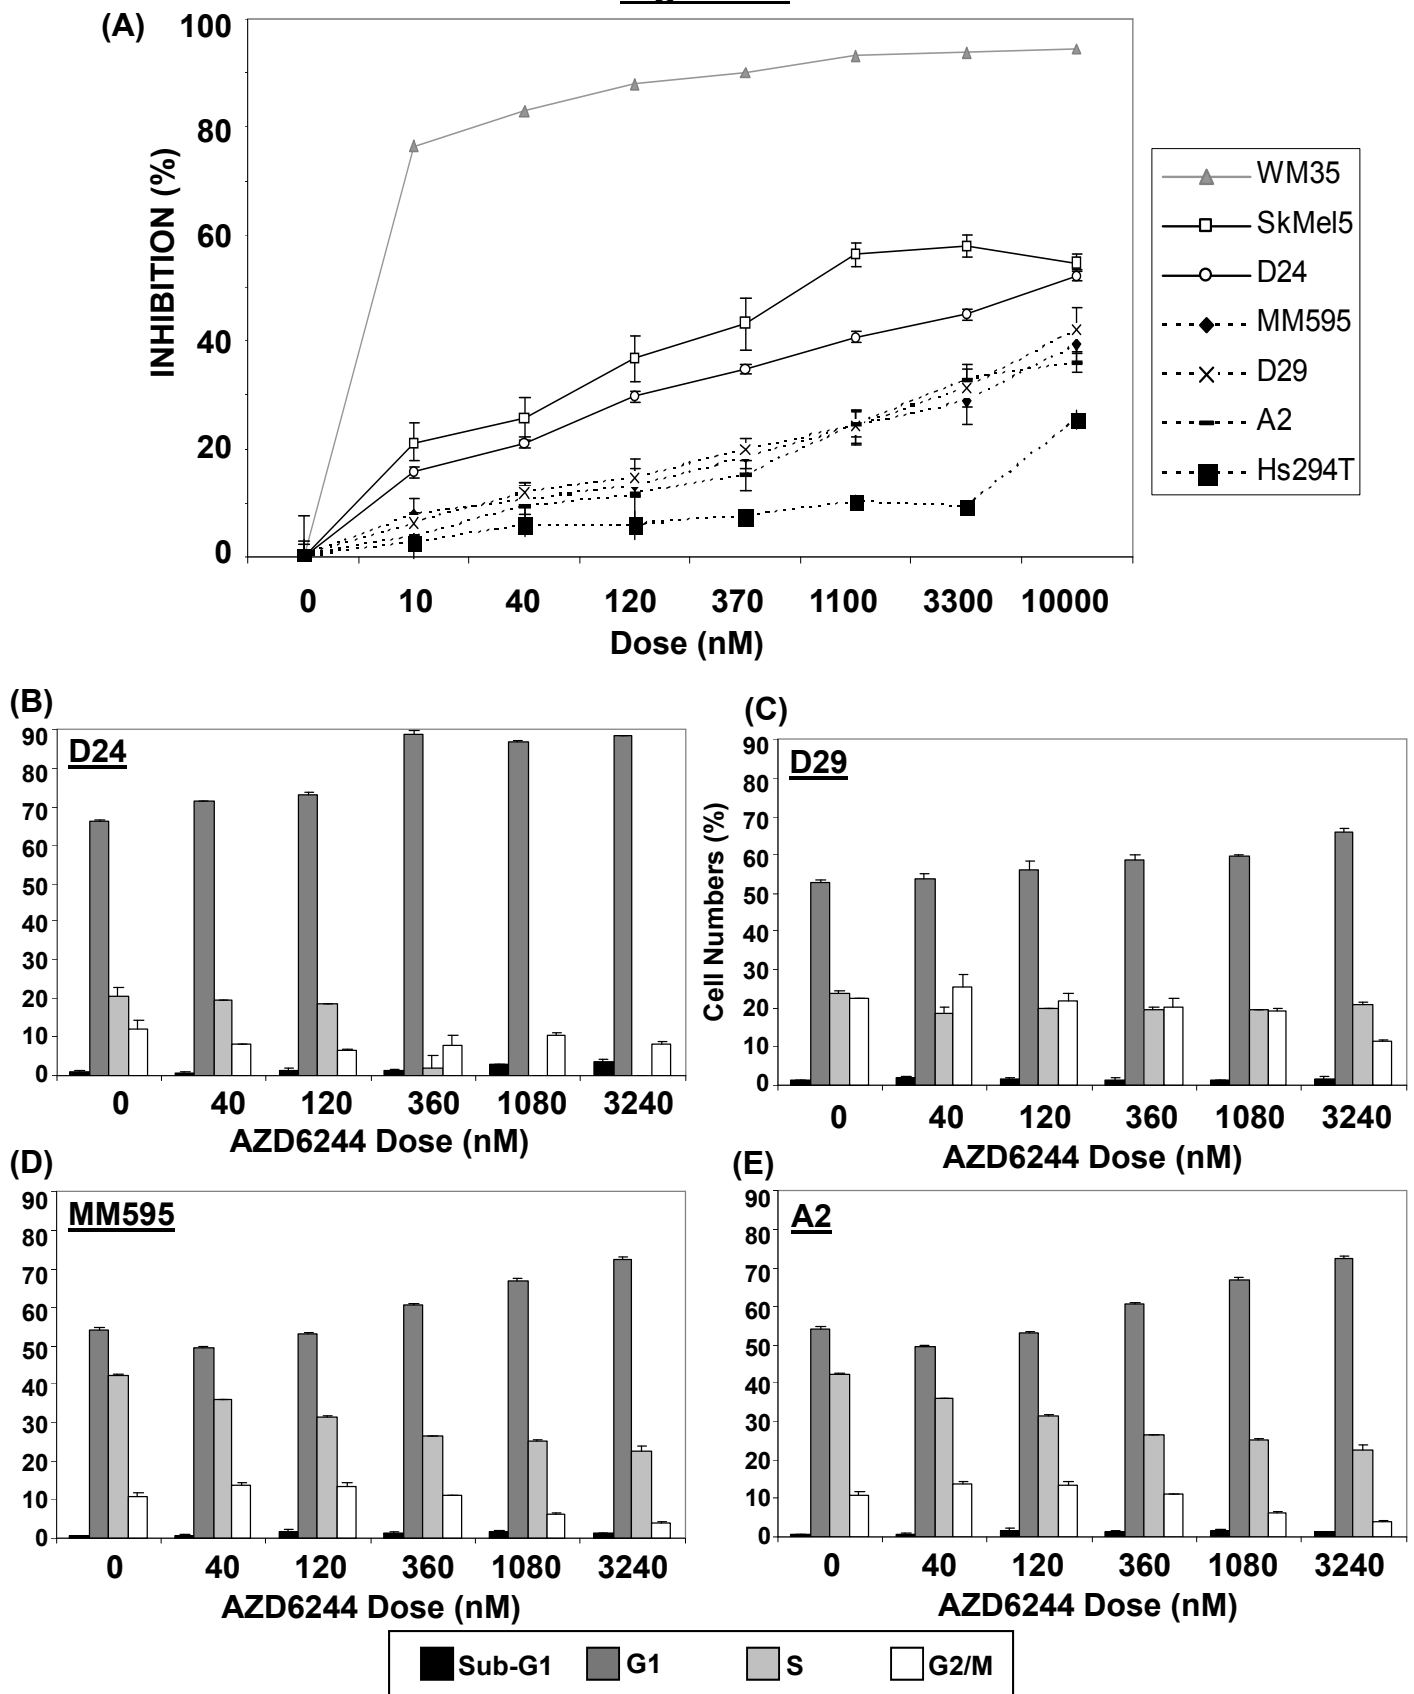

**Growth and survival inhibition by AZD6244 in D24, D29, and MM595 cell lines.** A, Growth inhibition in additional resistant lines D24, D29, MM595 and A2 treated with AZD6244 for 48 h. For comparison with Figure 1, results for the group 1 WM35, group 2 SKMEL5, and group 3 HS294T are shown. X-axis, concentration of AZD6244 (nM); Y-axis, % growth inhibition. Data points are the average of 3 replicates; error bars, standard deviation. B – D, cell cycle analysis of the resistant cell lines

**Figure S8**

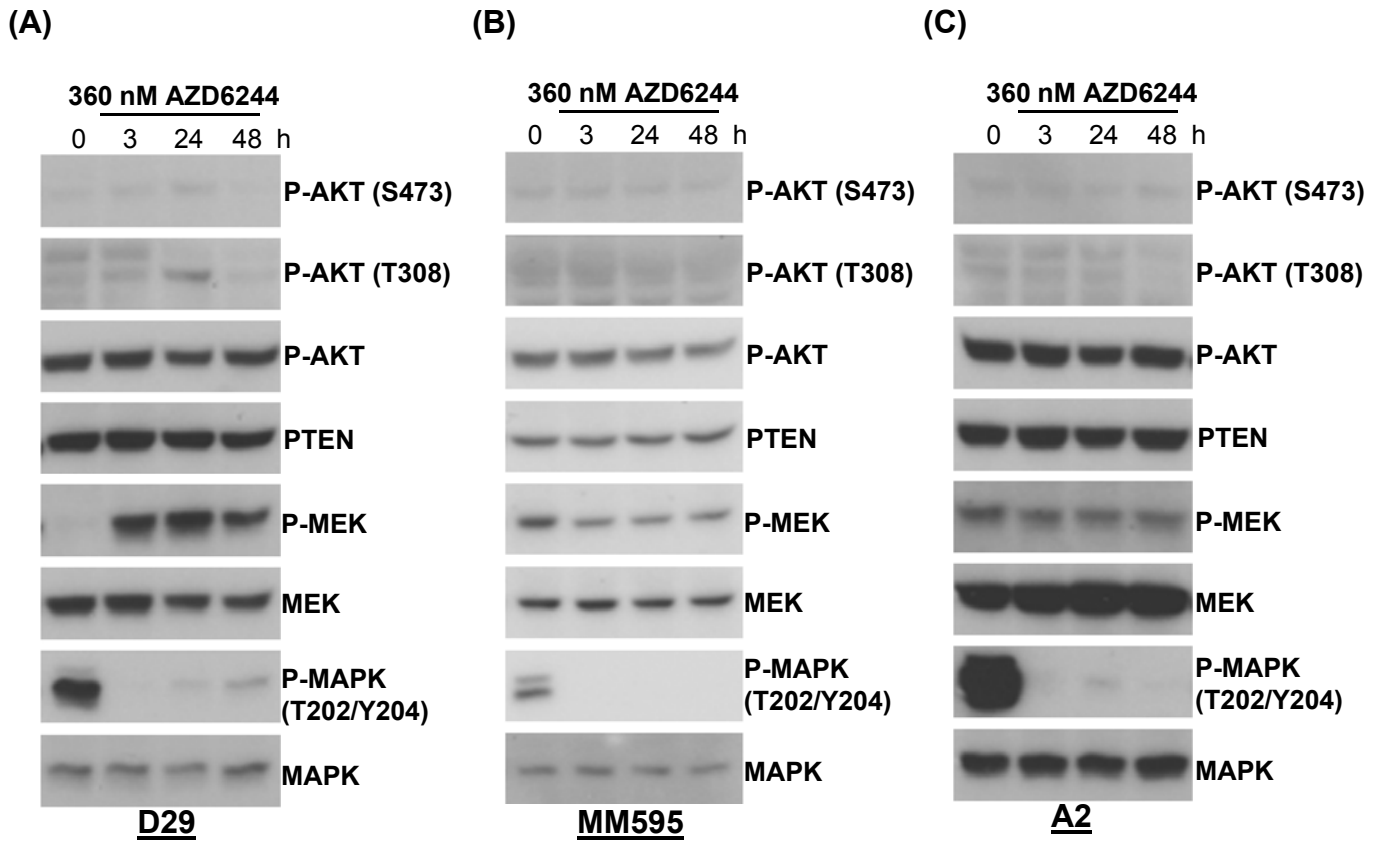

**P-AKT and P-MAPK in the highly resistant D29, MM595 and A2 cells with AZD6244 treatments.** The D29, MM595 and A2 cells were treated with 360 nM AZD6244 for the time periods shown, protein lysates were generated and analyzed by western blotting for the indicated proteins.

**Figure S9**

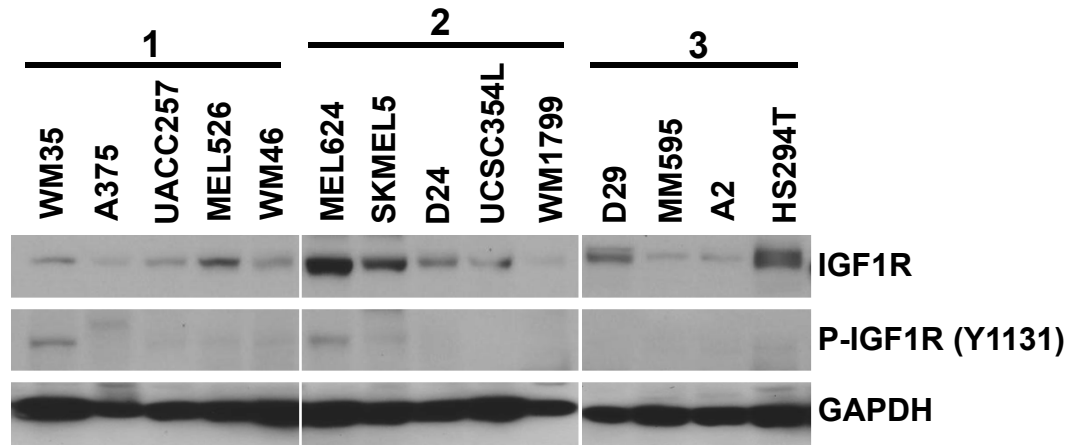

**Basal IGF1R levels in melanoma cell lines.** Melanoma cell lines were grown in 10 cm culture dishes to ~80% confluence in RPMI media with 5% serum. Protein lysates were generated, quantified, SDS-PAGE resolved and western blotted for IGF1R and P-IGF1R. P-IGF1R levels do not correlate with IGF1R levels. GAPDH was used as a loading control, which is heterogeneously expressed in the different cell lines. The horizontal bars on the top represent cells in the sensitivity groups 1, 2 and 3.

**Figure S10**

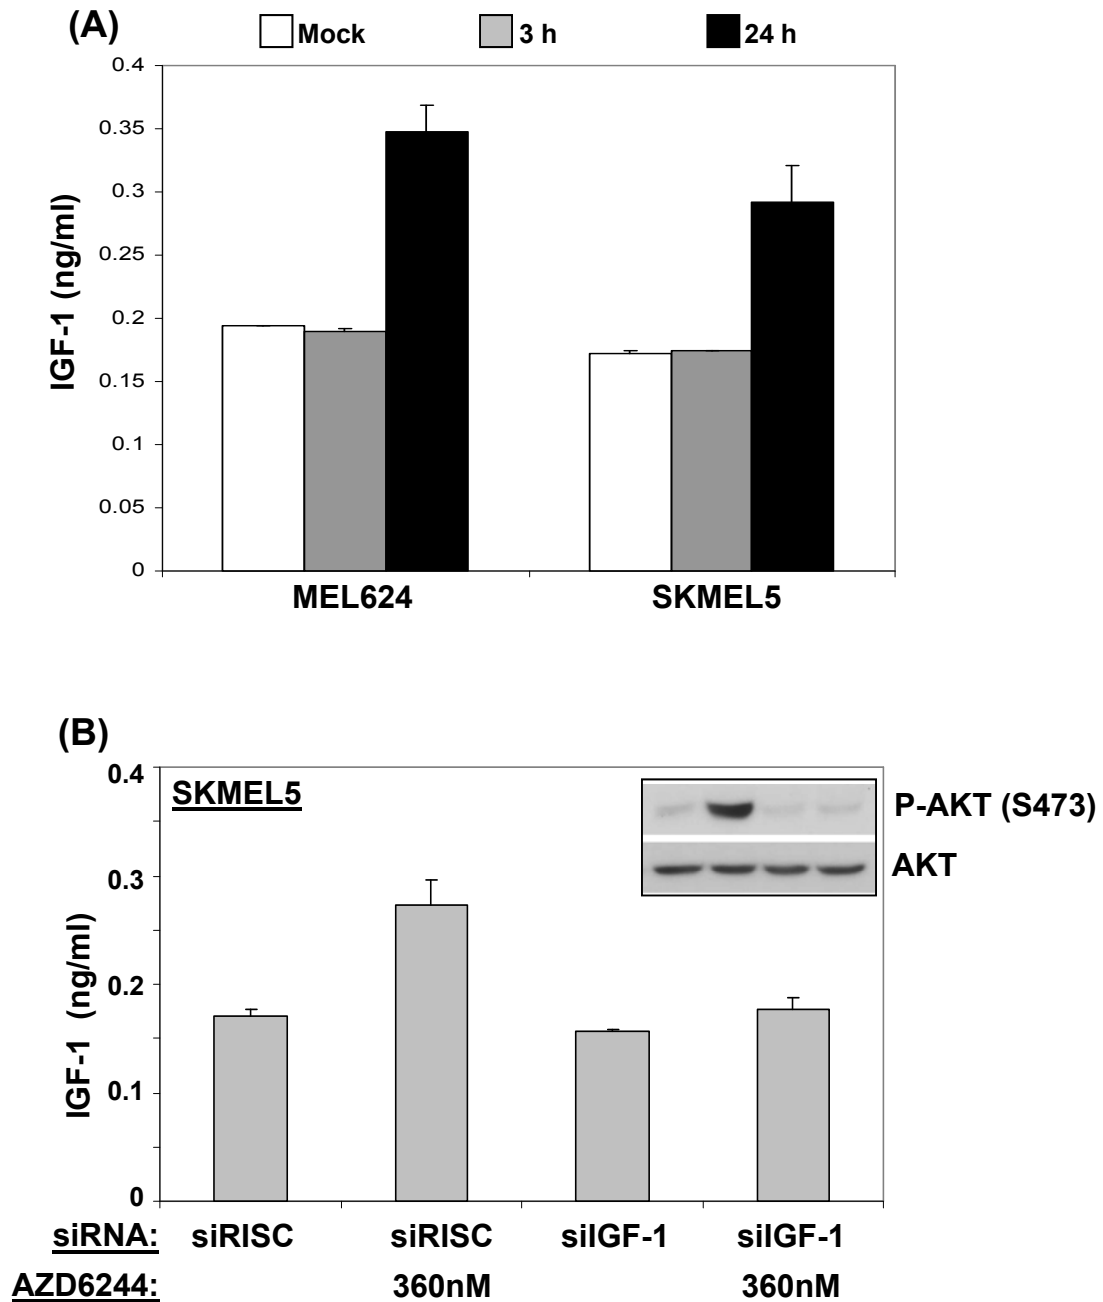

**AZD6244-induced secretion of IGF-1.** (A) The group 2 cells were treated with AZD6244 for 3 h or 24 h and the IGF-1 secreted into the medium was quantified by an IGF-1 ELISA assay. White bars represent basal IGF-1 levels in the media of mock (dms0) -treated cells, grey and black bars represent IGF-1 secretion after 3h and 24h of AZD6244 treatment. Fresh unspent media also showed similar levels of IGF-1 as the dms0 controls (not shown). (B) SKMEL5 cells were transfected with siRisc or siIGF-1 siRNAs for 48 h, followed by 24 h of AZD6244 treatment. Lysates were generated and western blotted for P-AKT and AKT (inset picture). Treatments are shown on the X-axis of the bar-graph. Secreted IGF-1 levels in media from the same experiment were quantified against IGF-1 standards and plotted on the Y-axis. Bars represent average of triplicates and error bars represent standard deviation.

**Figure S11**

**(A)**

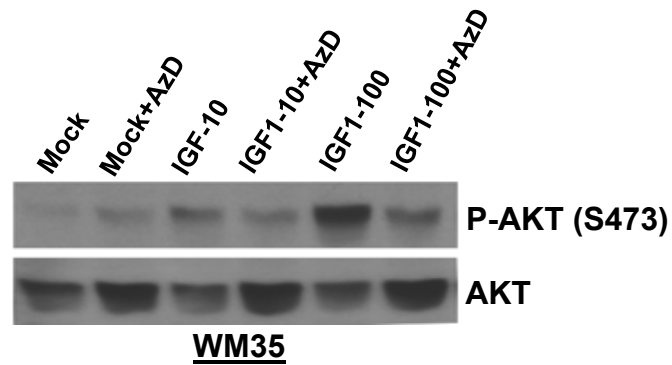

**(B)**

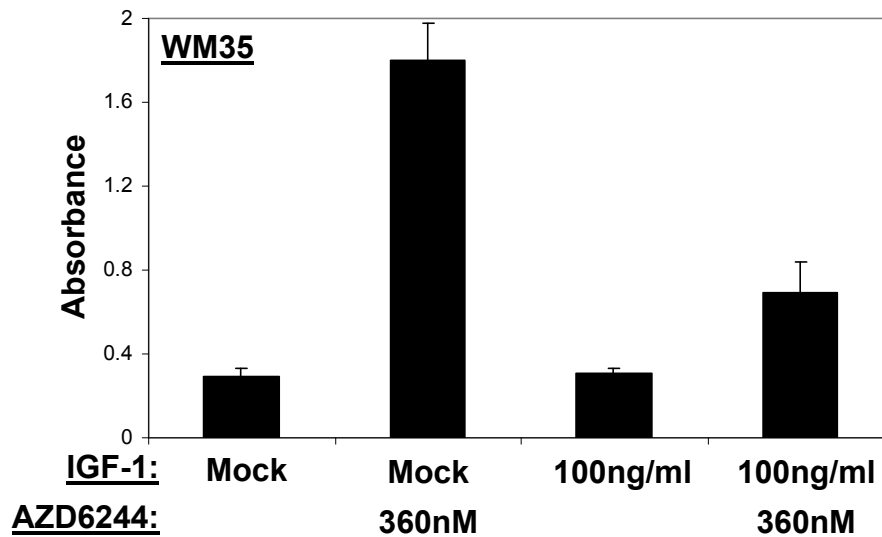

**Effect of IGF-1 on AZD6244-treated WM35 Cells. (A)** WM35 cells were treated with 360nM of AZD6244, 10ng/ml IGF-1, 100ng/ml IGF-1 or a combination of AZD6244 and 10ng/ml IGF-1 or 100ng/ml AZD6244 for 24 h. The cells were harvested and western blotted for P-AKT and AKT. **(B)** The WM35 cells were treated as above, incubated for 48 h and cellular apoptosis was detected using the cytoplasmic histone DNA fragment analysis. Absorbance of the mock treatments represent no- or basal levels of apoptosis in untreated cells.

**Figure S12**

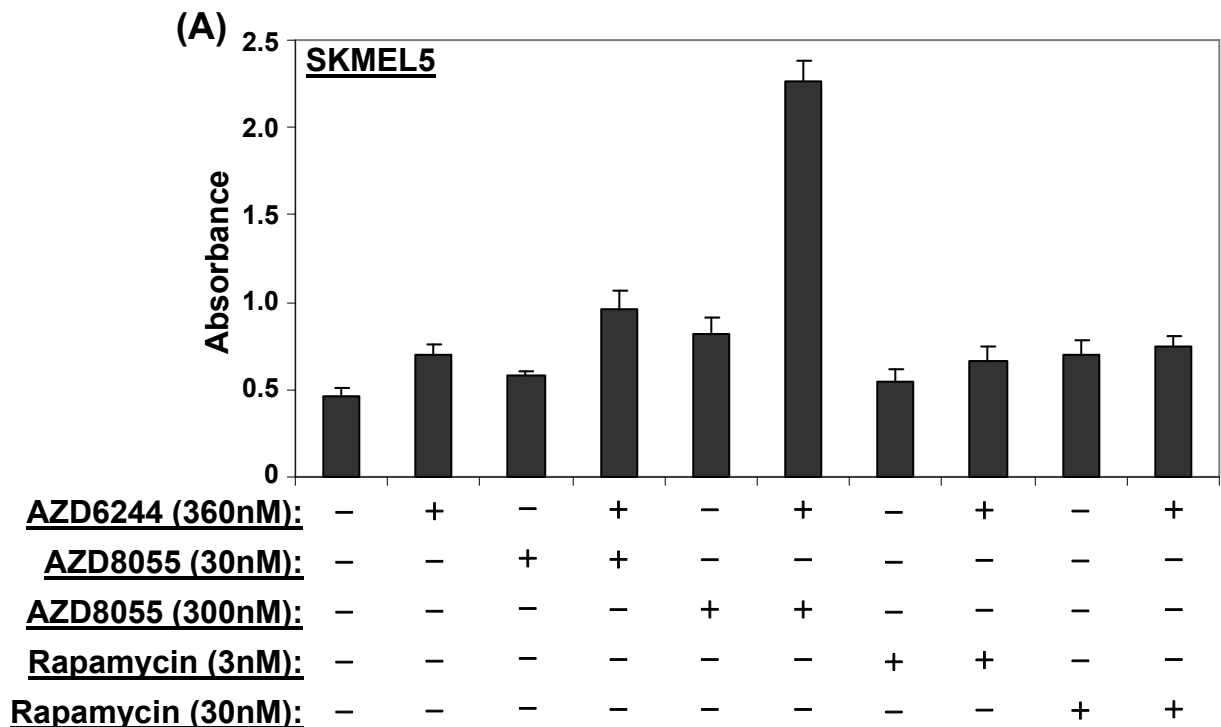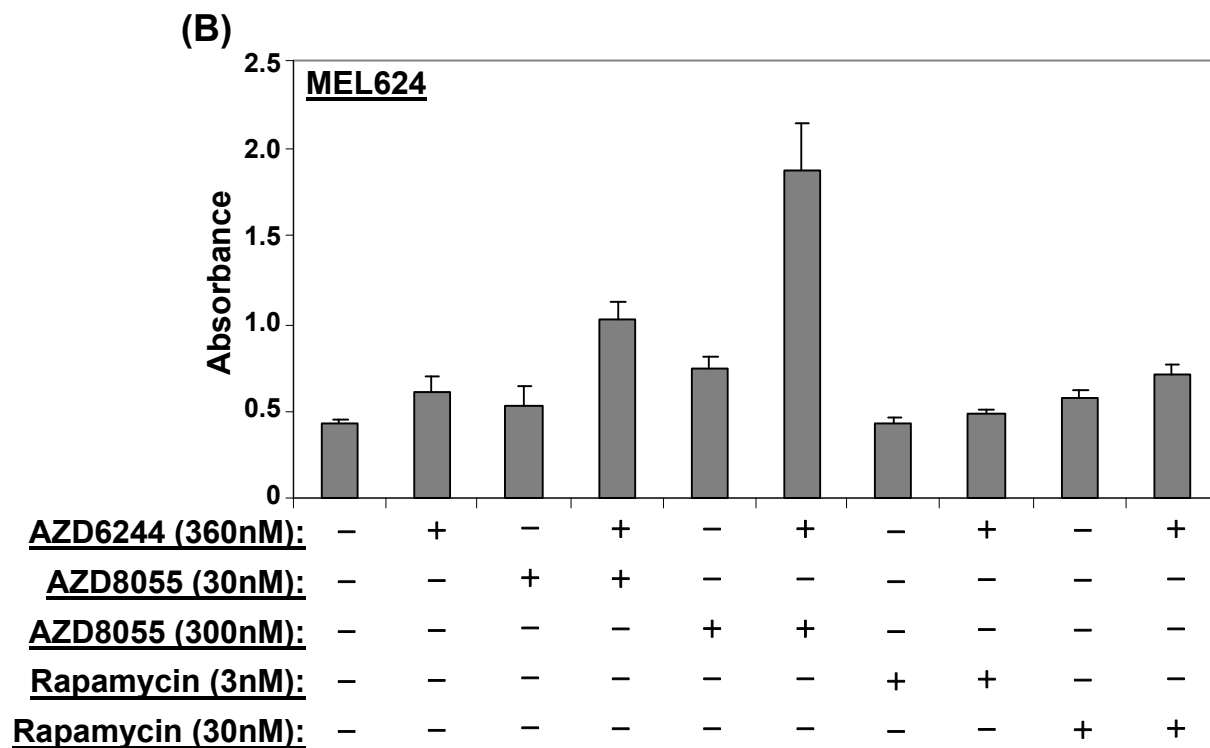

**Apoptosis induction in group 2 cells by AZD6244 combination treatments.**

The (A) SKMEL5 and (B) MEL624 cells were treated with AZD6244 or AZD8055 or Rapamycin, either singly or in combinations. Untreated controls always contained equivalent amounts of dms0 vehicle. Apoptosis induction was determined through the cytoplasmic histone-DNA fragment analysis. Absorbance of the control (dms0) treatments represent no- or basal levels of apoptosis in these cells. Bars represent average of triplicates and errors are indicated by standard deviation.
